# Supplementary material for: Individuality and convergence of the infant gut microbiota during the first year of life
Source: PubMed Central journal article supplement (PMC5993781; doi:10.1038/s41467-018-04641-7), 2018-06-08
Supplement: 41467_2018_4641_MOESM3_ESM.pdf [file 41467_2018_4641_MOESM3_ESM.pdf]

## **Description of Additional Supplementary Files**

File Name: Supplementary Data 1

Description: OTU taxonomic classification.
